# Supplementary material for: Automated Spectrophotometric Assays for the Measurement of Ammonia and Bicarbonate in Saliva of Horses: Analytical Validation and Changes in Equine Gastric Ulcer Syndrome (EGUS)
Source: MDPI journal article supplement (doi:10.3390/metabo14030147), 2024-02-28
Supplement: s1 [file s1]

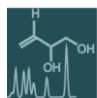

**Table S1.** Reason for gastroscopy of the 20 animals suspected of Equine Gastric Ulcer Syndrome with noncompatible findings at gastroscopy examination.

| Horse | Reason for gastroscopy                |
|-------|---------------------------------------|
| 1     | repeated colic                        |
| 2     | behavioural changes                   |
| 3     | repeated colic                        |
| 4     | riding issues                         |
| 5     | colic                                 |
| 6     | colic                                 |
| 7     | Abnorm behaviour, rearing and bucking |
| 8     | colic                                 |
| 9     | owner suspects EGUS                   |
| 10    | recurrent colic                       |
| 11    | colic                                 |
| 12    | riding issues                         |
| 13    | unspecific colic                      |
| 14    | abnormal behaviour                    |
| 15    | Colic and sand impaction              |
| 16    | repeated colic                        |
| 17    | tired                                 |
| 18    | behavioural changes                   |
| 19    | riding issues                         |
| 20    | riding issues                         |
